# Supplementary material for: Self-encapsulating Ag nanospheres in amorphous carbon: a novel ultrathin selective absorber for flexible solar-thermal conversion
Source: Royal Society of Chemistry journal article supplement (doi:10.1039/d1ta01538a), 2021-01-01
Supplement: d1ta01538a1.pdf [file d1ta01538a1.pdf]

## SUPPORTING INFORMATION

### **Self-encapsulating Ag nanospheres in amorphous carbon: A novel ultrathin selective absorber for flexible solar-thermal conversion**

Wei Li,<sup>a</sup> Chengbing Wang,<sup>a,b,\*</sup> Jinzhu Yang,<sup>a</sup> Jiulong Wang,<sup>a</sup> Wenhe Zhang<sup>a</sup>

<sup>a</sup> College of Materials Science and Engineering, Shaanxi Key Laboratory of Green Preparation and Functionalization for Inorganic Materials, Shaanxi University of Science and Technology, Xi'an, 710021, P. R. China

<sup>b</sup> Zhejiang Wenzhou Research Institute of Light Industry, Wenzhou 325003, Zhejiang, China.

\*Address Correspondence to [wangchengbing@gmail.com](mailto:wangchengbing@gmail.com)

## Corresponding theoretical calculation formula

(1) Optical absorption ( $\alpha$ ):

$$\alpha = \int_{200nm}^{2500nm} \frac{I_s(\lambda)(1 - R(\lambda))d\lambda}{I_s(\lambda)d\lambda}$$

(2) Infrared thermal emissivity ( $\varepsilon$ ):

$$\varepsilon = \int_{2.5\mu m}^{25\mu m} \frac{I_b(\lambda,T)(1 - R(\lambda))d\lambda}{I_b(\lambda,T)d\lambda}$$
$$I_b(\lambda,T) = \frac{C_1}{\lambda^5 \times [e^{\frac{C_2}{\lambda T}} - 1]}$$

Where  $\lambda$  is wavelength,  $R(\lambda)$  is measured reflection spectrum,  $I_s(\lambda)$  is 1.5AM Spectral irradiation,  $I_b(\lambda,T)$  represents black body radiation, where  $C_1 = 3.743 \times 10^{-16} \text{Wm}^2$ ,  
 $C_2 = 1.4387 \times 10^{-2} \text{mK}$

(3) photothermal conversion efficiency ( $\eta$ ):

$$\eta = \alpha - \frac{\sigma T^4}{CQ_1}$$

Where  $\sigma$ ,  $T$ ,  $C$ ,  $Q_1$  are Stefan-Boltzmann constant ( $5.67 \times 10^{-8} \text{W/m}^2\text{K}^4$ ), working temperature (353.15K), solar concentration factor (1 sun), solar flux intensity( $1\text{kW/m}^2$ ), respectively.

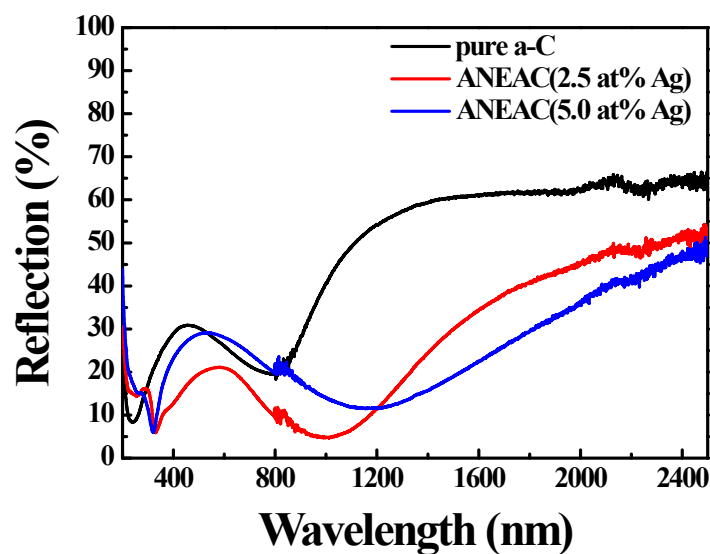

**Fig. S1.** The reflectance spectrum of ANEAC film with different Ag doping content between 200 nm to 2500 nm.

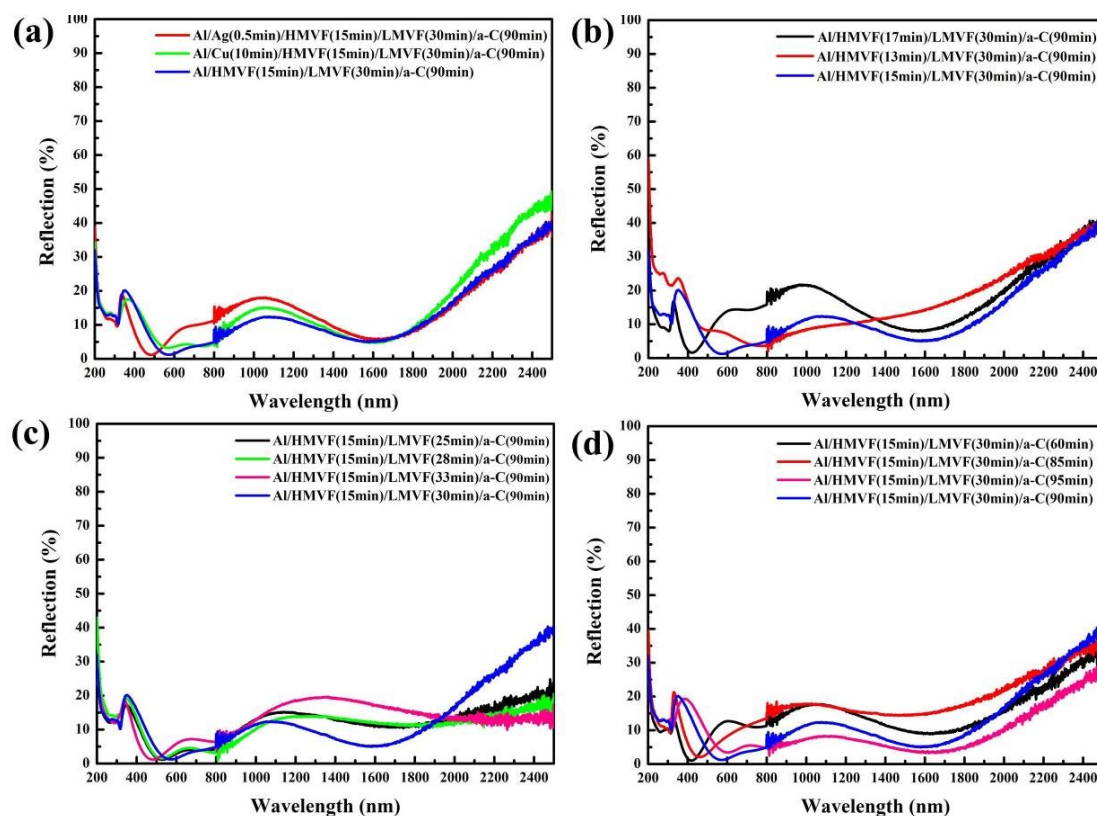

**Fig. S2.** Influence of single-layer deposition time (thickness) on the absorption of SSAs (Taking the sample (Al/HMVF (15 min)/LMVF (30 min)/a-C (90 min)) as reference). (a) The change of coating reflectivity before and after adding (Ag or Cu) infrared-reflective layer. (b–d) The variety curve of coating reflectivity with different deposition times of HMVF layer, LMVF layer, and a-C layer, respectively.

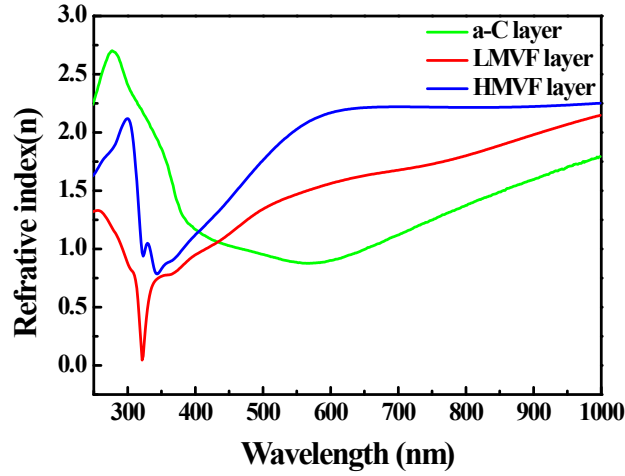

**Fig. S3.** The refractive index change curve of a-C layer, HMVF layer and LMVF layer.

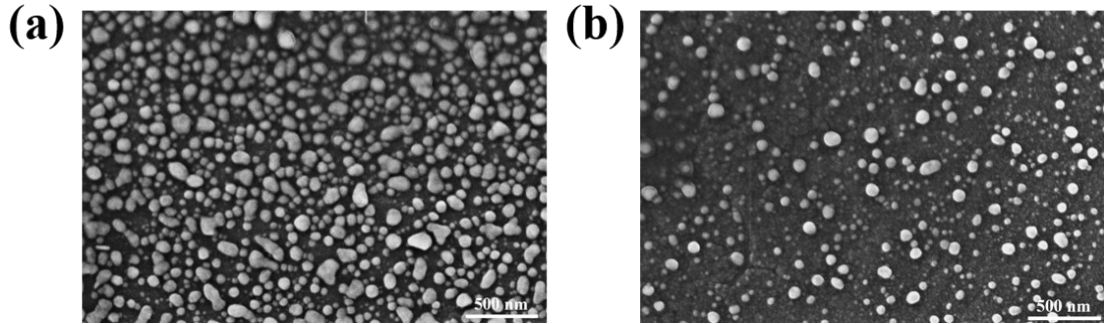

**Fig. S4.** Scanning image of ANEAC surface with different silver content: (a) HMVF layer; (b) LMVF layer.

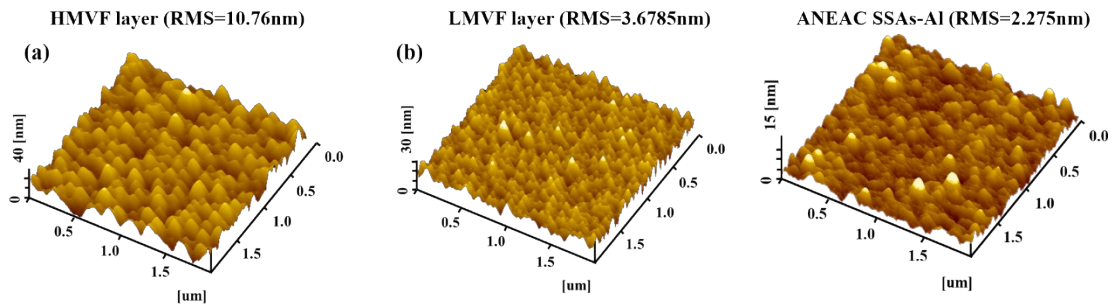

**Fig. S5.** Variation of surface roughness with different Ag content: (a) HMVF layer; (b) LMVF layer; c) Al/HMVF/LMVF/a-C SSAs.

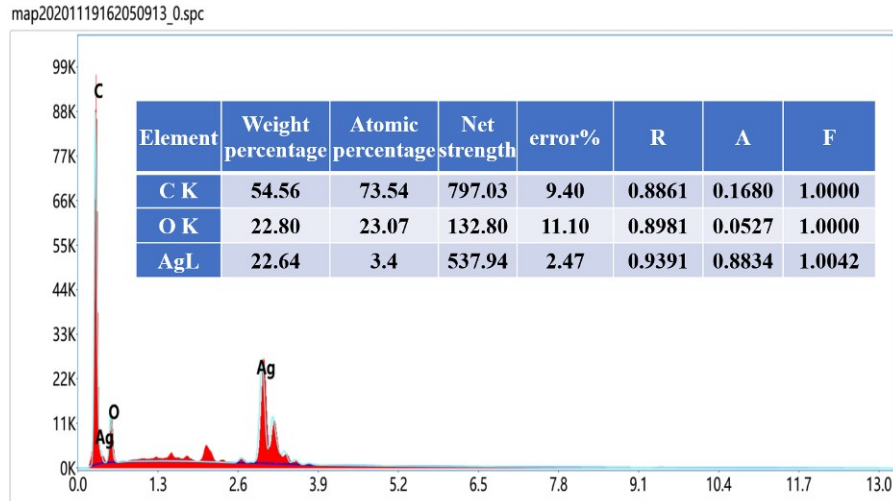

**Fig. S6.** Mapping of ANEAC SSAs-CT.

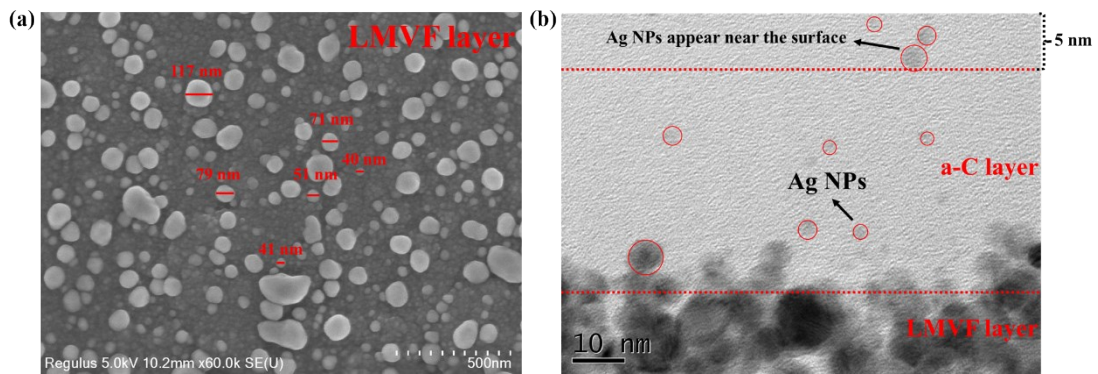

**Fig. S7** (a) Surface topography of LMVF layer; (b) Cross-sectional TEM image of a-C layer.

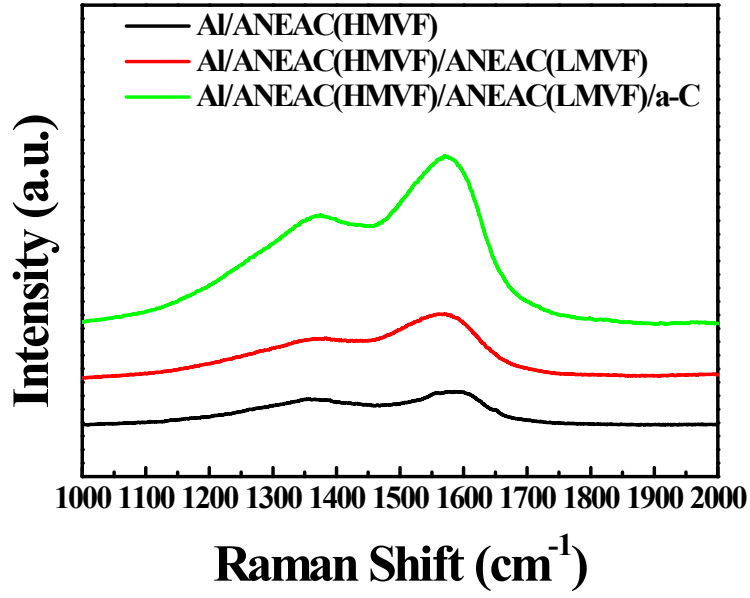

Fig. S8. Raman spectrum of layer-added of ANEAC SSAs–Al.

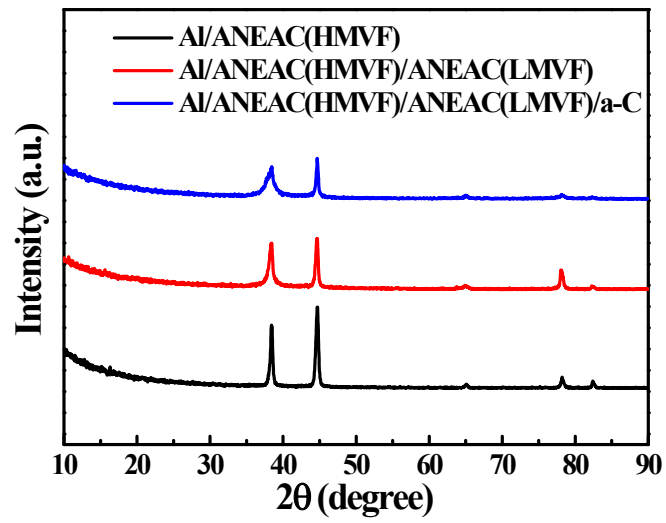

Fig. S9. XRD spectrum of layer-added of ANEAC SSAs–Al.

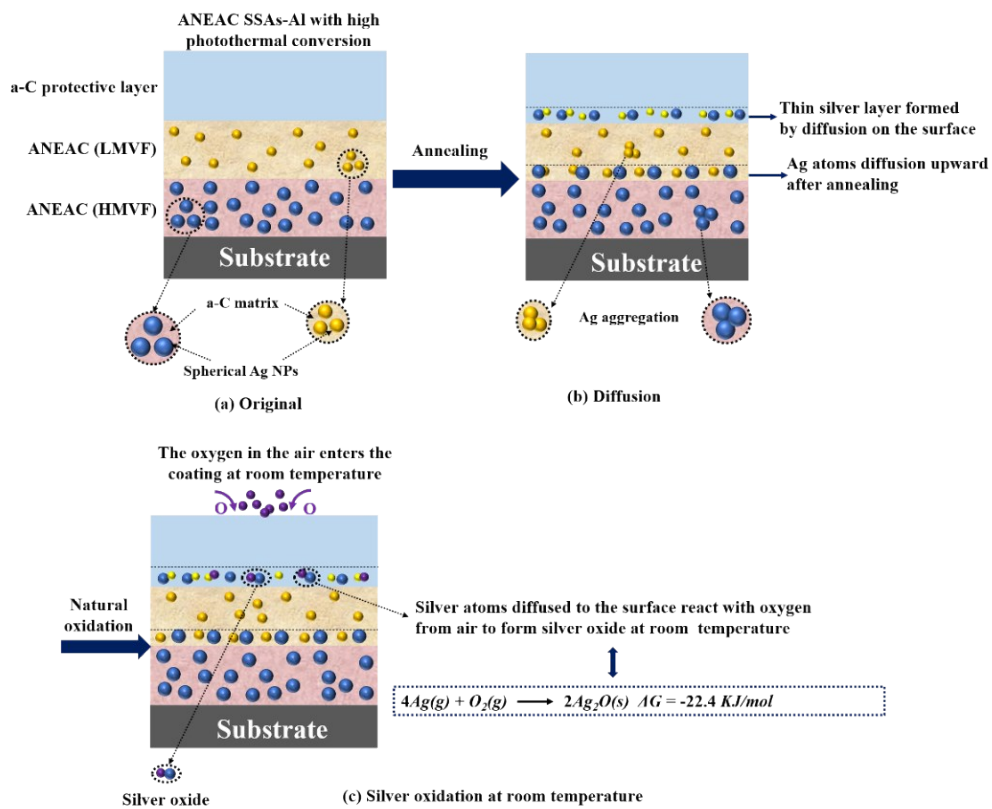

**Fig. S10.** Thermal stability mechanism of ANEAC SSAs–Al.

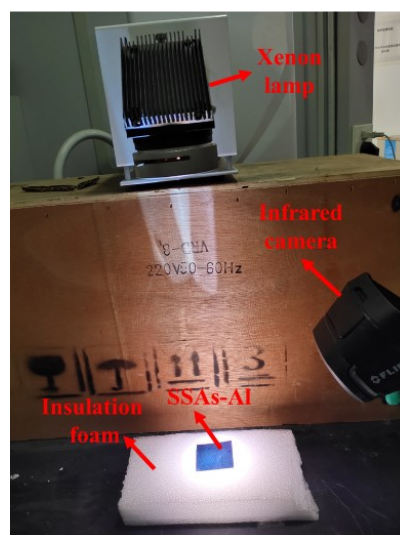

**Fig. S11.** The device diagram of photothermal experiment for ANEAC SSAs under standard solar radiation.



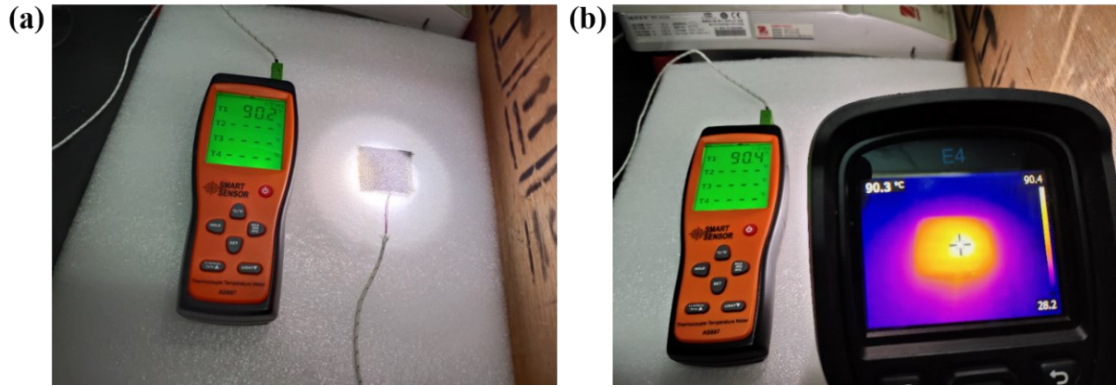

**Fig. S12.** (a) Using thermocouple alone to measure the temperature of SSAs-CT;(b) Use thermocouple and infrared camera to measure the temperature of SSAs-CT simultaneously.

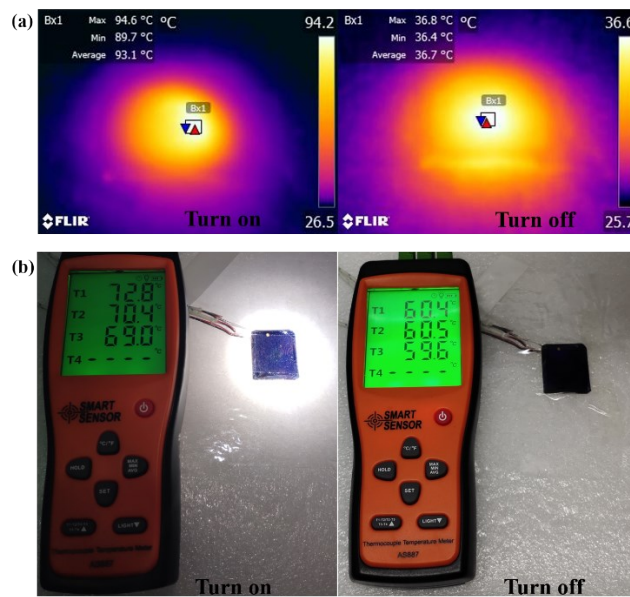

**Fig. S13.** (a) Using an infrared camera to measure the average surface temperature of the SSAs-CT before and after turning off the lights; (b) Using a thermocouple to measure the average temperature of the SSA-Al surface before and after turning off the light (Measure the temperature at three different locations and take the average value)



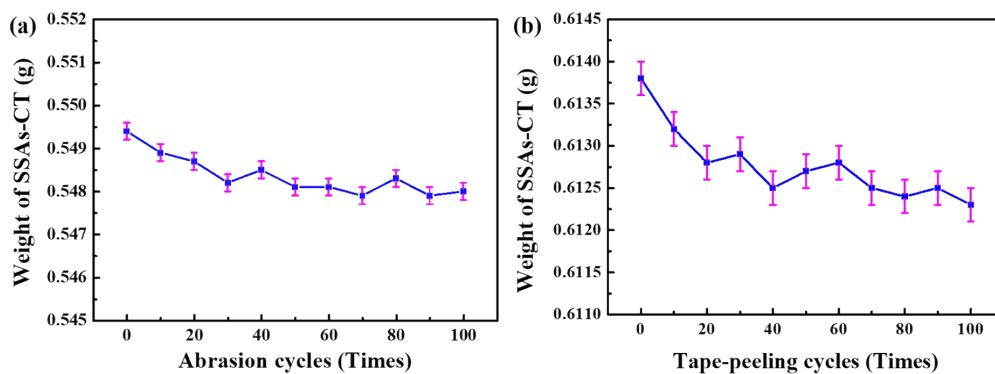

**Fig. S14.** The weight changes of ANEAC SSAs-CT before and after (a) abrasion cycles and (b) tape-peeling cycles.

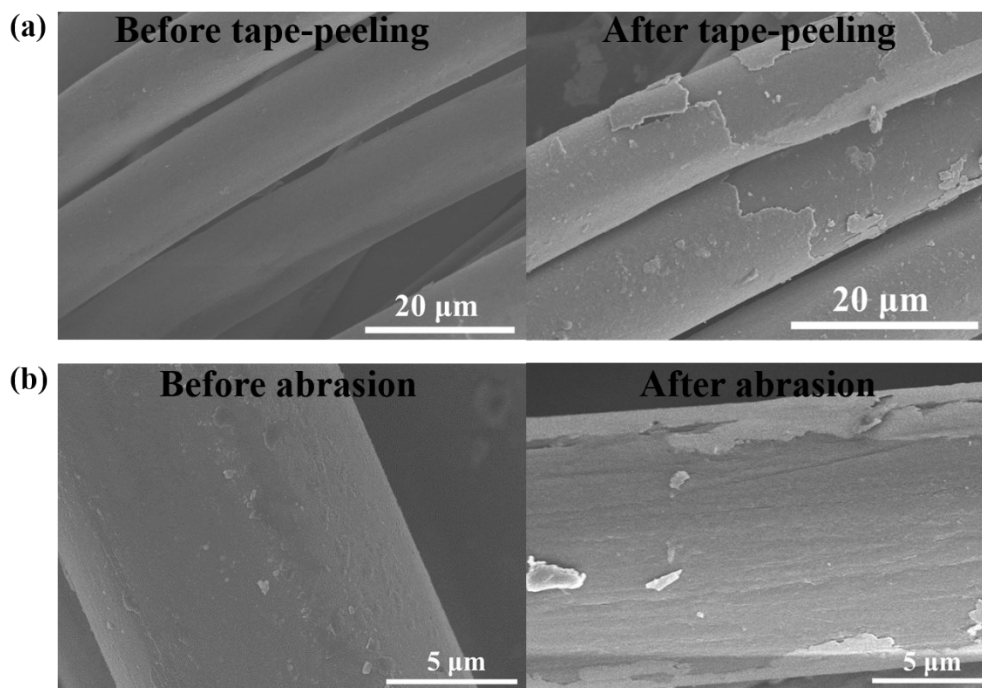

**Fig. S15.** Surface topography of ANEAC SSAs-CT before and after (a) tape-peeling and (b) abrasion cycles.

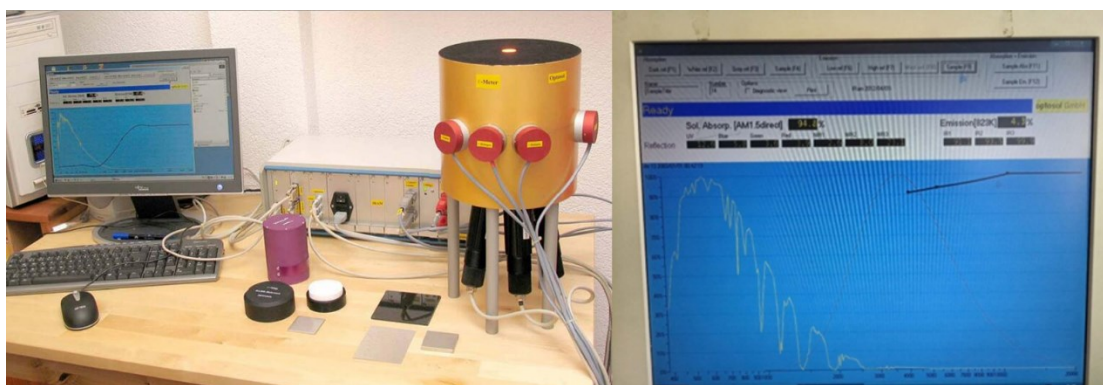

**Fig. S16.** The device and interface for K3 emissometer.

Table S1 Preparation parameters of ANEAC SSAs by co-sputtering.

| Layer | RF power (W) | Cathode current (A) | Cathode voltage (V) | Deposition time (min) | Monolayer thickness (nm) |
|-------|--------------|---------------------|---------------------|-----------------------|--------------------------|
| HMVF  | 200          | 0.02                | 230                 | 15                    | 40                       |
| LMVF  | 200          | 0.01                | 223                 | 30                    | 36                       |
| a-C   | 200          | 0                   | 0                   | 90                    | 50                       |

Table S2 Changes in absorptivity and thermal emissivity of ANEAC SSAs–Al with increasing annealing time.

| <b>Annealing time<br/>(h)</b> | <b><math>\alpha</math></b> | <b><math>\varepsilon</math></b> | <b><math>\alpha/\varepsilon</math></b> |
|-------------------------------|----------------------------|---------------------------------|----------------------------------------|
| <b>0</b>                      | 0.923                      | 0.061                           | 15.13                                  |
| <b>50</b>                     | 0.915                      | 0.059                           | 15.50                                  |
| <b>100</b>                    | 0.912                      | 0.062                           | 14.71                                  |
| <b>150</b>                    | 0.908                      | 0.063                           | 14.41                                  |
| <b>200</b>                    | 0.901                      | 0.064                           | 14.1                                   |

Table S3 Surface temperature of various photothermal materials under different solar radiation.

| <b>Solar absorber</b>                                                     | <b>Substrate</b> | <b>Surface temperature (°C)</b> | <b>Irradiation intensity (kW/m<sup>2</sup>)</b> | <b>Reference</b> |
|---------------------------------------------------------------------------|------------------|---------------------------------|-------------------------------------------------|------------------|
| <b>Polydopamine (PDA)@Mxene</b>                                           | –                | 80                              | 1                                               | [34]             |
| <b>MXene/AgNW–PVA film</b>                                                | –                | 40.2                            | 1                                               | [35]             |
| <b>MXene–PVDF membrane</b>                                                | –                | 75                              | 1                                               | [36]             |
| <b>Graphene metamaterial</b>                                              | Cu foil          | 80                              | 1                                               | [37]             |
| <b>rGO–MWCNT/PVDF</b>                                                     | –                | 77.6                            | 1                                               | [38]             |
| <b>Hydroxyapatite nanowires (HN)/CNT</b>                                  | paper            | 80                              | 1                                               | [39]             |
| <b>Single-walled carbon nanotube (SWCNT) film</b>                         | –                | 76                              | 1                                               | [40]             |
| <b>CNT</b>                                                                | Cotton cloth     | 82.4                            | 1                                               | [41]             |
| <b>MWCNTs@PPS/FC</b>                                                      | paper            | 78                              | 1                                               | [42]             |
| <b>Ti/MgF<sub>2</sub>/CT</b>                                              | Cu mesh          | 60                              | 1                                               | [43]             |
| <b>W/W–WO<sub>x</sub> (HA)/W–WO<sub>x</sub> (HA)/WO<sub>x</sub></b>       | PI sheet         | 78.1                            | 1                                               | [44]             |
| <b>Mo/Mo–MoO<sub>x</sub> (HA)/Mo–MoO<sub>x</sub> (HA)/MoO<sub>x</sub></b> | Cotton cloth     | 90                              | 1                                               | [45]             |
| <b>Bilayer single-walled carbon nanotube/AuNR film</b>                    | –                | 95                              | 5                                               | [46]             |
| <b>CuS/polyethylene (PE) hybrid membrane</b>                              | –                | 52                              | 1                                               | [47]             |
| <b>Flexible Ti<sub>2</sub>O<sub>3</sub>–PVA nanocomposite film</b>        | –                | 64.1                            | 5                                               | [48]             |
